# Supplementary material
Source: PubMed Central journal article supplement (PMC4371129)
Supplement: NIHMS664819-supplement-Figure_S1.pdf [file NIHMS664819-supplement-Figure_S1.pdf]

**Supplementary Figure S1.** Linkage disequilibrium plot for the HapMap CHB (Han Chinese from Beijing, China, n=84) reference dataset single-nucleotide polymorphisms (SNPs) (genotypes downloaded from the International HapMap Project website; HapMap3, release 2; chr1:165663570..165742500) in *CD247*. This plot was obtained with Haploview 4.2 using the pairwise R-square color scheme in a grey scale.

\*Significant *P*-value, obtained for the Asian cohort in our study, under the additive model and adjusted for the first three principal components and gender ( $P_{\text{adj}} < 0.05$ ); \*\*Significant *P*-value, obtained for the Asian cohort in our study, overpassing Bonferroni correction ( $P_{\text{adj}} < 0.0017$ ); ■Significant *P*-value obtained in the Asian population GWAS [19] ( $P < 0.05$ ); ■■The most significant *P*-value in *CD247* obtained in the Asian population GWAS [19] ( $P = 8.70\text{E-}05$ ). SNP ID from our study is indicated for the highlighted SNPs, when there is no correspondence with our SNPs then SNP rs is indicated.
