# Supplementary material
Source: PubMed Central journal article supplement (PMC4371129)
Supplement: NIHMS664819-supplement-Figure_S2.pdf [file NIHMS664819-supplement-Figure_S2.pdf]

a)

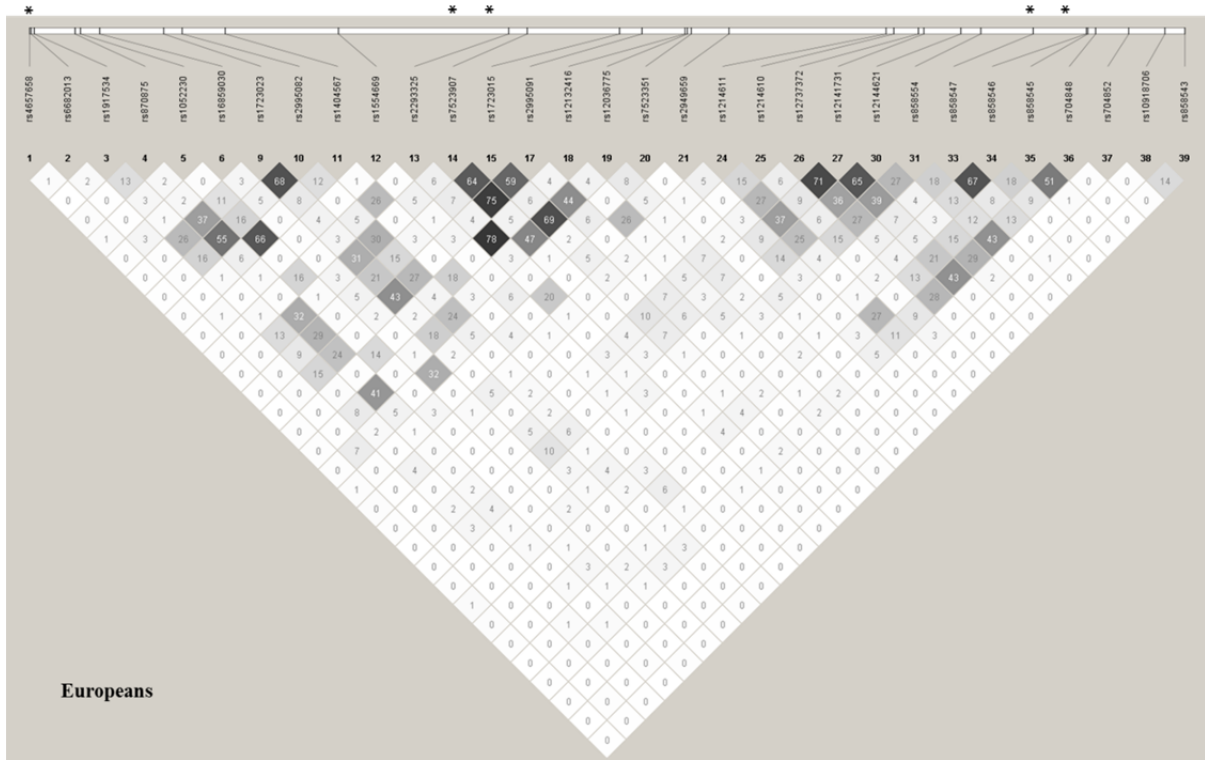

b)

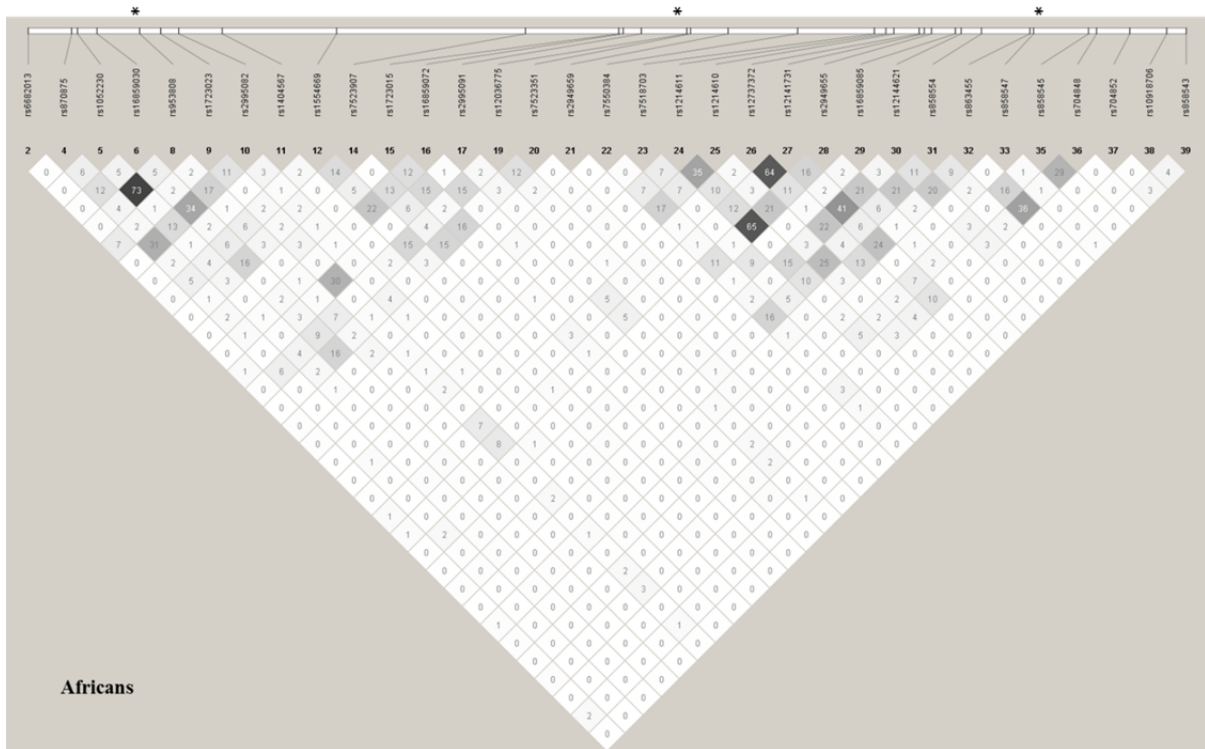

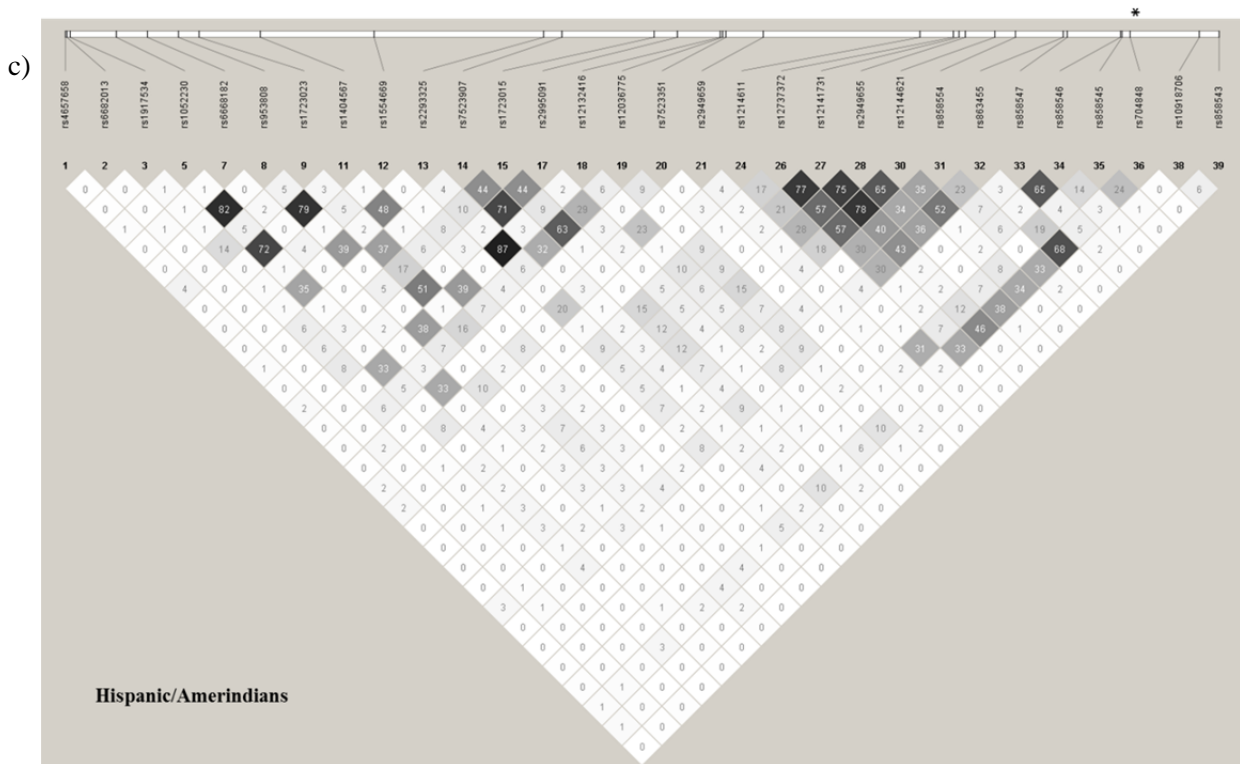

**Supplementary Figure S2.** Linkage disequilibrium plots for the genotyped SNPs in *CD247* in: a) the European population (31 SNPs); b) the African population (33 SNPs); and c) the Hispanic/Amerindian population (30 SNPs). These plots were obtained with Haploview 4.2 using the pairwise R-square color scheme in a grey scale. \*Significant  $P$ -value under the additive model and adjusted for the first three principal components and gender ( $P_{\text{adj}} < 0.05$ ).
