# Supplementary material
Source: PubMed Central journal article supplement (PMC4371129)
Supplement: NIHMS664819-supplement-Table_S1.pdf [file NIHMS664819-supplement-Table_S1.pdf]

**Supplementary Table S1.** Results of imputed SNPs allelic association in *CD247* gene at 1q24.2 with SLE

| SNP ID | SNP reference     | Position (Mb) | Gene region | Alleles <sup>a</sup> | P-value         | SNP INFO |
|--------|-------------------|---------------|-------------|----------------------|-----------------|----------|
|        | rs870873          | 165666127     | Downstream  | C/T                  | 0.2950          | 1.010    |
|        | rs1052231         | 165666698     | 3' UTR      | T/A                  | 0.2950          | 1.010    |
|        | rs3738212         | 165666923     | 3' UTR      | C/G                  | 0.4070          | 0.954    |
|        | rs952963          | 165669836     | Intron 6    | A/G                  | 0.2950          | 1.010    |
|        | rs953809          | 165670249     | Intron 5    | A/G                  | 0.2950          | 1.010    |
|        | rs3108156         | 165670702     | Intron 5    | G/A                  | 0.3150          | 0.956    |
|        | rs2480679         | 165674141     | Intron 4    | A/G                  | 0.3160          | 0.954    |
|        | rs2258497         | 165674697     | Intron 3    | C/A                  | 0.3160          | 0.954    |
|        | rs840016          | 165675294     | Intron 2    | T/C                  | 0.2060          | 0.962    |
|        | rs2280635         | 165677015     | Intron 1    | C/T                  | 0.5580          | 0.911    |
|        | rs2056626         | 165687049     | Intron 1    | G/T                  | <b>1.42E-02</b> | 1.010    |
|        | rs1773560         | 165688387     | Intron 1    | G/A                  | <b>1.83E-02</b> | 1.010    |
|        | rs3108155         | 165688681     | Intron 1    | G/C                  | <b>1.42E-02</b> | 1.010    |
|        | rs1214596         | 165693794     | Intron 1    | A/T                  | <b>3.01E-02</b> | 0.997    |
|        | rs1214595         | 165694181     | Intron 1    | A/G                  | <b>1.41E-02</b> | 1.030    |
|        | rs2995088         | 165697816     | Intron 1    | C/T                  | 0.0585          | 0.868    |
|        | rs2995089         | 165697817     | Intron 1    | A/G                  | <b>8.84E-03</b> | 1.030    |
|        | rs12124119        | 165697849     | Intron 1    | A/G                  | 0.6560          | 0.941    |
|        | rs2988277         | 165697976     | Intron 1    | T/C                  | <b>3.36E-02</b> | 1.040    |
|        | rs2988276         | 165698027     | Intron 1    | C/T                  | <b>3.98E-02</b> | 0.934    |
|        | rs10918694        | 165698620     | Intron 1    | T/C                  | 0.1640          | 0.836    |
|        | rs1773542         | 165699573     | Intron 1    | C/T                  | <b>5.98E-03</b> | 0.804    |
|        | rs1723016         | 165699680     | Intron 1    | C/T                  | <b>5.98E-03</b> | 0.804    |
|        | rs1723018         | 165700044     | Intron 1    | G/A                  | <b>5.98E-03</b> | 0.804    |
|        | rs12072450        | 165701053     | Intron 1    | C/G                  | 0.6790          | 1.090    |
|        | rs10918695        | 165704577     | Intron 1    | T/C                  | 0.4320          | 0.985    |
|        | rs2480678         | 165710047     | Intron 1    | T/G                  | <b>1.38E-02</b> | 0.852    |
|        | rs2995093         | 165711625     | Intron 1    | G/A                  | <b>3.06E-03</b> | 0.944    |
|        | rs12128094        | 165714311     | Intron 1    | C/T                  | 0.9490          | 0.869    |
| 23     | <b>rs7518703</b>  | 165715016     | Intron 1    | C/A                  | 0.9490          | 0.869    |
| 24     | <b>rs1214611</b>  | 165715728     | Intron 1    | A/G                  | <b>2.91E-03</b> | 0.829    |
| 25     | <b>rs1214610</b>  | 165716214     | Intron 1    | C/A                  | 0.9490          | 0.869    |
|        | rs1214609         | 165716232     | Intron 1    | T/C                  | 0.9490          | 0.869    |
|        | rs4657662         | 165716706     | Intron 1    | A/G                  | <b>1.48E-02</b> | 0.888    |
|        | rs12130552        | 165717488     | Intron 1    | C/A                  | 0.9490          | 0.869    |
|        | rs1214606         | 165717970     | Intron 1    | T/G                  | <b>8.69E-03</b> | 1.010    |
| 27     | <b>rs12141731</b> | 165718064     | Intron 1    | T/C                  | <b>1.12E-02</b> | 0.958    |
|        | rs2949656         | 165718453     | Intron 1    | C/T                  | <b>8.69E-03</b> | 1.010    |
| 28     | <b>rs2949655</b>  | 165718474     | Intron 1    | A/G                  | <b>9.49E-03</b> | 0.985    |
|        | rs12133337        | 165719314     | Intron 1    | C/T                  | 0.2010          | 0.984    |
|        | rs10918698        | 165719383     | Intron 1    | G/A                  | 0.2010          | 0.984    |
| 30     | <b>rs12144621</b> | 165720282     | Intron 1    | C/G                  | <b>5.58E-03</b> | 0.903    |
|        | rs858557          | 165720970     | Intron 1    | T/C                  | <b>4.82E-04</b> | 1.040    |
|        | rs858556          | 165720982     | Intron 1    | C/T                  | <b>4.82E-04</b> | 1.040    |
|        | rs858553          | 165721769     | Intron 1    | A/G                  | <b>4.82E-04</b> | 1.040    |
| 32     | <b>rs863455</b>   | 165724448     | Intron 1    | C/T                  | <b>6.29E-03</b> | 0.926    |
|        | rs10918702        | 165724716     | Intron 1    | A/G                  | <b>4.12E-03</b> | 0.871    |
| 35     | <b>rs858545</b>   | 165728015     | Intron 1    | A/C                  | <b>4.08E-03</b> | 0.833    |
| 36     | <b>rs704848</b>   | 165728497     | Intron 1    | C/G                  | <b>4.15E-02</b> | 0.929    |
|        | rs2949654         | 165732879     | Intron 1    | G/A                  | 0.2830          | 0.988    |
|        | rs12060060        | 165734320     | Intron 1    | T/C                  | 0.2800          | 0.924    |

Abbreviations: Mb, Megabases; SNP INFO, information content metric on the quality of SNP imputation; <sup>a</sup>major/minor allele.

Significant *P*-values (<0.05) are highlighted in bold. Previously genotyped SNPs are in bold and have the corresponding SNP ID.
