# Supplementary material
Source: PubMed Central journal article supplement (PMC4371129)
Supplement: NIHMS664819-supplement-Table_S2.pdf [file NIHMS664819-supplement-Table_S2.pdf]

**Supplementary Table S2.** Results of SNP association in *CD247* gene at 1q24.2 with SLE in the European, African and Hispanic/Amerindian populations

| SNP ID | SNP reference | Position (Mb) | Gene region | European                 |                 |                        | African                  |                 |                        | Hispanic/Amerindian      |                 |                        |
|--------|---------------|---------------|-------------|--------------------------|-----------------|------------------------|--------------------------|-----------------|------------------------|--------------------------|-----------------|------------------------|
|        |               |               |             | Alleles<br>(minor/major) | <i>P</i> -value | OR[95% CI]             | Alleles<br>(minor/major) | <i>P</i> -value | OR[95% CI]             | Alleles<br>(minor/major) | <i>P</i> -value | OR[95% CI]             |
| 1      | rs4657658     | 165663574     | Downstream  | G/A                      | <b>2.81E-02</b> | <b>0.91[0.83-0.99]</b> | G/A                      | NA              | NA                     | G/A                      | 0.0594          | 0.83[0.68-1.01]        |
| 2      | rs6682013     | 165663703     | Downstream  | G/A                      | 0.2405          | 1.05[0.97-1.13]        | G/A                      | 0.6629          | 1.05[0.85-1.29]        | G/A                      | 0.9307          | 0.99[0.86-1.14]        |
| 3      | rs1917534     | 165663896     | Downstream  | A/G                      | 0.6294          | 0.98[0.92-1.05]        | A/G                      | NA              | NA                     | A/G                      | 0.2106          | 0.92[0.81-1.05]        |
| 4      | rs870875      | 165666359     | Downstream  | C/A                      | 0.4274          | 1.03[0.96-1.11]        | C/A                      | 0.4849          | 1.04[0.94-1.15]        | A/C                      | NA              | NA                     |
| 5      | rs1052230     | 165666706     | 3' UTR      | C/G                      | 0.9290          | 1.00[0.90-1.10]        | C/G                      | 0.4898          | 1.05[0.92-1.20]        | C/G                      | 0.8993          | 1.01[0.83-1.23]        |
| 6      | rs16859030    | 165667879     | Intron 7    | A/G                      | 0.2046          | 1.11[0.95-1.29]        | A/G                      | <b>2.07E-02</b> | <b>0.87[0.77-0.98]</b> | A/G                      | NA              | NA                     |
| 7      | rs6668182     | 165668608     | Intron 7    | A/G                      | NA              | NA                     | A/G                      | NA              | NA                     | A/G                      | 0.2323          | 1.16[0.91-1.47]        |
| 8      | rs953808      | 165670469     | Intron 5    | G/C                      | NA              | NA                     | G/C                      | 0.2382          | 1.08[0.95-1.22]        | G/C                      | 0.7952          | 0.97[0.79-1.20]        |
| 9      | rs1723023     | 165671757     | Intron 4    | A/G                      | 0.5936          | 0.98[0.92-1.05]        | A/G                      | 0.0924          | 0.86[0.73-1.03]        | A/G                      | 0.7990          | 0.98[0.85-1.13]        |
| 10     | rs2995082     | 165672870     | Intron 4    | G/A                      | 0.3068          | 0.97[0.90-1.03]        | G/A                      | 0.0836          | 0.92[0.83-1.01]        | G/A                      | NA              | NA                     |
| 11     | rs1404567     | 165675499     | Intron 2    | G/A                      | 0.2269          | 0.94[0.85-1.04]        | G/A                      | 0.1472          | 1.14[0.95-1.37]        | G/A                      | 0.8441          | 0.98[0.80-1.20]        |
| 12     | rs1554669     | 165682416     | Intron 1    | G/A                      | 0.1464          | 0.90[0.79-1.04]        | G/A                      | 0.1958          | 1.08[0.96-1.21]        | G/A                      | 0.9670          | 1.00[0.82-1.21]        |
| 13     | rs2293325     | 165692771     | Intron 1    | A/G                      | 0.3909          | 0.94[0.83-1.08]        | A/G                      | NA              | NA                     | A/G                      | 0.7218          | 1.04[0.83-1.31]        |
| 14     | rs7523907     | 165693872     | Intron 1    | G/A                      | <b>2.85E-02</b> | <b>0.93[0.86-0.99]</b> | G/A                      | 0.8992          | 1.01[0.91-1.11]        | G/A                      | 0.6858          | 0.97[0.85-1.11]        |
| 15     | rs1723015     | 165699519     | Intron 1    | G/A                      | <b>1.83E-02</b> | <b>0.92[0.86-0.99]</b> | G/A                      | 0.9620          | 1.00[0.91-1.10]        | G/A                      | 0.6715          | 1.03[0.91-1.17]        |
| 16     | rs16859072    | 165699820     | Intron 1    | A/G                      | NA              | NA                     | A/G                      | 0.5952          | 1.05[0.88-1.25]        | A/G                      | NA              | NA                     |
| 17     | rs2995091     | 165700902     | Intron 1    | G/A                      | 0.1160          | 0.95[0.88-1.01]        | G/A                      | 0.4225          | 0.93[0.79-1.10]        | G/A                      | 0.9499          | 1.00[0.86-1.15]        |
| 18     | rs12132416    | 165703507     | Intron 1    | A/G                      | 0.8863          | 0.99[0.86-1.14]        | A/G                      | NA              | NA                     | A/G                      | 0.8030          | 1.03[0.82-1.30]        |
| 19     | rs12036775    | 165703672     | Intron 1    | A/G                      | 0.0931          | 1.06[0.99-1.14]        | A/G                      | 0.1951          | 1.07[0.97-1.19]        | A/G                      | 0.3792          | 1.06[0.93-1.20]        |
| 20     | rs7523351     | 165703888     | Intron 1    | G/C                      | 0.6238          | 1.03[0.92-1.15]        | G/C                      | 0.2454          | 0.93[0.83-1.05]        | G/C                      | 0.1771          | 0.87[0.70-1.07]        |
| 21     | rs2949659     | 165706163     | Intron 1    | G/A                      | 0.9564          | 1.00[0.88-1.13]        | G/A                      | 0.6354          | 1.03[0.92-1.16]        | G/A                      | 0.5844          | 0.95[0.81-1.13]        |
| 22     | rs7550384     | 165710384     | Intron 1    | G/A                      | NA              | NA                     | G/A                      | 0.2684          | 1.08[0.94-1.25]        | G/A                      | NA              | NA                     |
| 23     | rs7518703     | 165715017     | Intron 1    | C/A                      | NA              | NA                     | C/A                      | 0.1070          | 1.18[0.96-1.45]        | C/A                      | NA              | NA                     |
| 24     | rs1214611     | 165715729     | Intron 1    | A/G                      | 0.6487          | 0.98[0.92-1.05]        | G/A                      | <b>2.95E-02</b> | <b>1.11[1.01-1.23]</b> | A/G                      | 0.2017          | 0.92[0.81-1.05]        |
| 25     | rs1214610     | 165716215     | Intron 1    | C/A                      | 0.3617          | 1.04[0.95-1.14]        | C/A                      | 0.1048          | 1.10[0.98-1.23]        | C/A                      | NA              | NA                     |
| 26     | rs12737372    | 165717740     | Intron 1    | A/G                      | 0.3261          | 0.96[0.89-1.04]        | A/G                      | 0.4384          | 1.08[0.90-1.29]        | A/G                      | 0.6820          | 1.03[0.89-1.20]        |
| 27     | rs12141731    | 165718065     | Intron 1    | A/G                      | 0.2225          | 0.96[0.89-1.03]        | A/G                      | 0.2380          | 1.10[0.94-1.29]        | A/G                      | 0.6833          | 1.03[0.90-1.18]        |
| 28     | rs2949655     | 165718475     | Intron 1    | A/G                      | NA              | NA                     | A/G                      | 0.7618          | 1.02[0.92-1.12]        | A/G                      | 0.3226          | 1.07[0.94-1.23]        |
| 29     | rs16859085    | 165719959     | Intron 1    | G/A                      | NA              | NA                     | G/A                      | 0.4503          | 1.05[0.92-1.21]        | G/A                      | NA              | NA                     |
| 30     | rs12144621    | 165720283     | Intron 1    | C/G                      | 0.6756          | 1.02[0.94-1.10]        | C/G                      | 0.2346          | 1.08[0.95-1.23]        | C/G                      | 0.7843          | 1.02[0.88-1.18]        |
| 31     | rs858554      | 165721539     | Intron 1    | A/G                      | 0.2795          | 1.04[0.97-1.11]        | A/G                      | 0.6303          | 1.03[0.93-1.13]        | G/A                      | 0.2774          | 0.93[0.82-1.06]        |
| 32     | rs863455      | 165724449     | Intron 1    | A/G                      | NA              | NA                     | A/G                      | 0.9128          | 1.01[0.88-1.15]        | A/G                      | 0.1631          | 0.91[0.79-1.04]        |
| 33     | rs858547      | 165724692     | Intron 1    | A/G                      | 0.2417          | 0.94[0.85-1.04]        | A/G                      | 0.9073          | 0.99[0.80-1.23]        | A/G                      | 0.6119          | 0.95[0.76-1.17]        |
| 34     | rs858546      | 165727947     | Intron 1    | A/G                      | 0.1520          | 0.92[0.82-1.03]        | A/G                      | NA              | NA                     | A/G                      | 0.7910          | 0.97[0.75-1.25]        |
| 35     | rs858545      | 165728016     | Intron 1    | A/C                      | <b>4.51E-02</b> | <b>1.07[1.00-1.15]</b> | C/A                      | <b>5.92E-03</b> | <b>1.15[1.04-1.27]</b> | A/C                      | 0.3180          | 1.07[0.94-1.22]        |
| 36     | rs704848      | 165728498     | Intron 1    | C/G                      | <b>1.12E-02</b> | <b>0.92[0.85-0.98]</b> | C/G                      | 0.5043          | 1.04[0.93-1.16]        | C/G                      | <b>3.39E-02</b> | <b>0.87[0.76-0.99]</b> |
| 37     | rs704852      | 165730541     | Intron 1    | C/A                      | 0.6036          | 0.98[0.90-1.06]        | C/A                      | 0.7608          | 0.98[0.88-1.10]        | C/A                      | NA              | NA                     |
| 38     | rs10918706    | 165732746     | Intron 1    | A/G                      | 0.2756          | 0.96[0.89-1.03]        | A/G                      | 0.6949          | 1.03[0.89-1.20]        | A/G                      | 0.8676          | 1.01[0.86-1.20]        |
| 39     | rs858543      | 165733923     | Intron 1    | A/G                      | 0.6240          | 1.02[0.94-1.10]        | A/G                      | 0.5157          | 1.04[0.93-1.16]        | A/G                      | 0.0677          | 1.15[0.99-1.32]        |

Abbreviations: Mb, Megabases; OR, odds ratio; 95% CI, 95% confidence interval.

The presented genetic association *P*-values are under the additive model and adjusted for the first three principal components and gender.

Univariately significant *P*-values (<0.05) are highlighted in bold.
